can be made in current COVID-19 pandemic since its advantage of zero aerosolisation. Researchers should focus on innovation in techniques and simultaneous high-quality studies to evaluate them.

#### EP.TU.701

### Colon Capsule Endoscopy versus Computed Tomographic Colonography for identifying Colorectal Cancer and Polyps: a systemic review and meta-analysis

Ashutosh Gumber<sup>1</sup>, Gautam Kumar<sup>2</sup>, Sangara Narayanan Narayanasamy<sup>3</sup>, Vibha Ramesh<sup>4</sup>, Ajay Aspari<sup>5</sup>, Kawan Shalli<sup>6</sup>

<sup>1</sup>University Hospital Wishaw, <sup>2</sup>Royal Bolton Hospital, <sup>3</sup>Queens hospital Burton, <sup>4</sup>Broomfield Hospital, <sup>5</sup>Southend University Hospital, <sup>6</sup>University Hospital Wishaw

**Aim:** Early diagnosis and treatment of Colorectal Cancer can improve outcomes. Polypectomy with colonoscopy has failure and incompleteness rates with risk of aerosol-generation. Computed Tomographic Colonography, second investigation, is limited by radiation exposure and aerosol generation. Colon Capsule endoscopy is a novel technique without gas insufflation, therefore avoiding the discomfort and aerosol-generation.

Our aim is to compare the yield of the CCE with CTC in CRC and polyps in patients with positive stool tests or diagnosed colorectal lesions.

**Methods:** Review followed PRISMA standards. Electronic database (EMBASE, MEDLINE, PubMed, CINAHL) searched for RCTs and Observational studies. MedCalc Statistical Software used for the synthesis of results. Primary (Per-Lesion and Per-Patient sensitivity analysis) and secondary (Other lesion and completion rate sensitivity analysis) outcomes measured using a random-effect model.

**Results:** We found one RCT and three observational studies. Per-Lesion Sensitivity Analysis of CCE versus CTC showed overall effect of 1.903 (0.990- 1.937), p-value-0.057. Per-Patient Sensitivity Analysis of showed overall effect of 1.928 (0.995-1.892), p-value-0.054. Other lesions Sensitivity Analysis showed overall effect of 0.810 (0.121-161.995), p-value-0.418. Completion Rate Sensitivity Analysis showed overall effect of -0.419 (0.526-1.516), p-value-0.676.

**Conclusion:** CCE had a better detection rate for colorectal cancer and polyp than the CTC, but this was not statistically significant. Therefore, this study failed to prove CCE's superiority over CTC. A careful decision
